## **A genetic system for generating single-sex progeny in mice**

Ido Yosef, Inbar Shlomovitz, Rea Globus, Liat Edry-Botzer, Ariel Munitz, Motti Gerlic<sup>†,#</sup>,  
and Udi Qimron<sup>†,#</sup>

Department of Clinical Microbiology and Immunology, Sackler School of Medicine, Tel Aviv  
University, Tel Aviv 69978, Israel

<sup>†</sup>These authors jointly supervised this work.

<sup>#</sup>Corresponding authors: [mgerlic@post.tau.ac.il](mailto:mgerlic@post.tau.ac.il), [ehudq@post.tau.ac.il](mailto:ehudq@post.tau.ac.il)

## 1 **Abstract**

2 The ability to preselect the sex of livestock is economically beneficial and significantly  
3 increases the welfare and proper use of animals. In the poultry industry, for example,  
4 almost all males are brutally and unnecessarily killed shortly after hatching<sup>1</sup>. The labor and  
5 associated costs of separation of females from males, as well as the massive killing of  
6 males, could be eliminated by using a system producing single-sex progeny. Here, we  
7 provide a proof of concept for such a system in mice by crossing two genetically engineered  
8 lines. The maternal line encodes a functional Cas9 protein on an autosomal chromosome,  
9 whereas the paternal line encodes guide RNAs on the Y chromosome targeting vital mouse  
10 genes. After fertilization, the presence of both the Y-encoded guide RNAs from the  
11 paternal sperm and the Cas9 protein from the maternal egg target the vital genes in males.  
12 We show that this breeding consequently self-destructs solely the males. Our results pave  
13 the way for a biased sex production of livestock, thus saving labor, costs, and eliminating  
14 substantial animal suffering.

## 15 **Main**

16 Some aquatic organisms as well as plants that benefit from single-sex cultivation have been  
17 produced mostly by hormonal feminization of males or by masculinization of females and  
18 the subsequent production of a single-sex progeny. This was demonstrated in crustaceans<sup>2</sup>,  
19 fish<sup>3-5</sup>, and is also common in growing *Cannabis sativa*, where feminized seeds are desired  
20 (<https://cannabistraininguniversity.com/feminize-marijuana-seeds>). However, these  
21 practices are not feasible for terrestrial livestock.

22 The sex ratio in a population of mosquitoes and flies was shifted by manipulating  
23 specific genes that distort the sex ratio<sup>6-8</sup>. In recent breakthrough studies, researchers have  
24 even completely distorted the sex ratio, accompanied by the sterility of females, thus  
25 resulting in a collapsed population<sup>9-12</sup>. Such an outcome is desirable for disease-  
26 transferring insects in the wild, but not for domesticated livestock.

27 For domesticated livestock, a different approach should be adopted, which  
28 produces a desired sex, while retaining a reservoir of males and females to maintain such  
29 a set-up. Manipulated animals that produce only one sex are impossible to sustain by self-

30 crossing, because either the male or female is absent, or due to sub-fertility or infertility of  
31 the manipulated animal. Thus, despite the identification of genetic factors such as *Sry*,  
32 *Sox9*, *Foxl2*, and *Wnt4*, that determine the sex of animals, and the success of reversing  
33 animal's sex, fertility and other genetic restrictions precluded a system that reliably  
34 produces a single sex progeny<sup>13-17</sup>.

35 We chose to provide a proof of concept for an approach that produces single-sex  
36 mouse progeny while retaining a reproductive reservoir of males and females. For  
37 developing mice that produce only females, we used two self-sustained mouse lines, each  
38 producing males and females at an equal ratio. One line, henceforth termed the “Cas9-  
39 line”, encoded the CRISPR-Cas9 enzyme from *Streptococcus pyogenes*, expressed from a  
40 CAG promoter on an autosomal chromosome<sup>18</sup>. We generated the other line, henceforth  
41 termed the “Y-line”, encoding on its Y chromosome three CRISPR guide RNAs (gRNAs)  
42 targeting three autosomal genes (Fig. S1 and Appendix 1). The selected target genes,  
43 *Atp5b*, *Cdc20*, and *Casp8*, were all shown to be essential for mouse early development<sup>19,20</sup>  
44 [*Atp5b* deficiency in mice results in embryonic lethality prior to organogenesis  
45 (<https://monarchinitiative.org/gene/MGI:107801#phenotypes>); *Cdc20* deficiency in mice  
46 results in metaphase arrest in two-cell stage embryos and consequently in early embryonic  
47 death<sup>21</sup>; *Casp8* deficiency results in necroptosis and consequently in embryonic death<sup>22</sup>].  
48 We selected targeting three different genes to reduce the probability of simultaneous non-  
49 targeting of the three genes, or simultaneous in-frame corrections of these three genes, or  
50 such combinations that may result in viable males. We hypothesized that crossing these  
51 two lines would result in a progeny consisting of female-only mice, since the resulting male  
52 mice, encoding both the Cas9 and the Y chromosome gRNAs, cannot develop normally.  
53 We further hypothesized that the litter size would be half the normal size, since half of the  
54 progeny do not develop properly. To test our hypotheses, we crossed the Y-line males with  
55 the Cas9-line females, and as a control, we crossed the Y-line males with C57BL/6J  
56 females (Fig. 1a). The control cross between the Y-line males and the C57BL/6J females  
57 produced 41 pups with an average of 6.84 pups per litter (Fig. 1b). Four pups from this  
58 cross died within 3 days after birth. The cross between the Y-line males and the Cas9-line  
59 females produced 18 pups with an average of 4.50 pups per litter (Fig. 1b). Seven pups  
60 from this cross died within 3 days after birth. Physical examination of the sex of the pups

61 at day 7 revealed a ratio of 23:14 live males to females in the cross of the Y-line males with  
62 C57BL/6J females, compared to 11 live female pups with no males in the cross between  
63 the Y-line males and Cas9-line females (Fig. 1c). All mice from day 7 survived to weaning.  
64 These results demonstrate, for the first time, a genetic system for producing single-sex  
65 progeny in mammals while maintaining a reservoir of fertile parents.

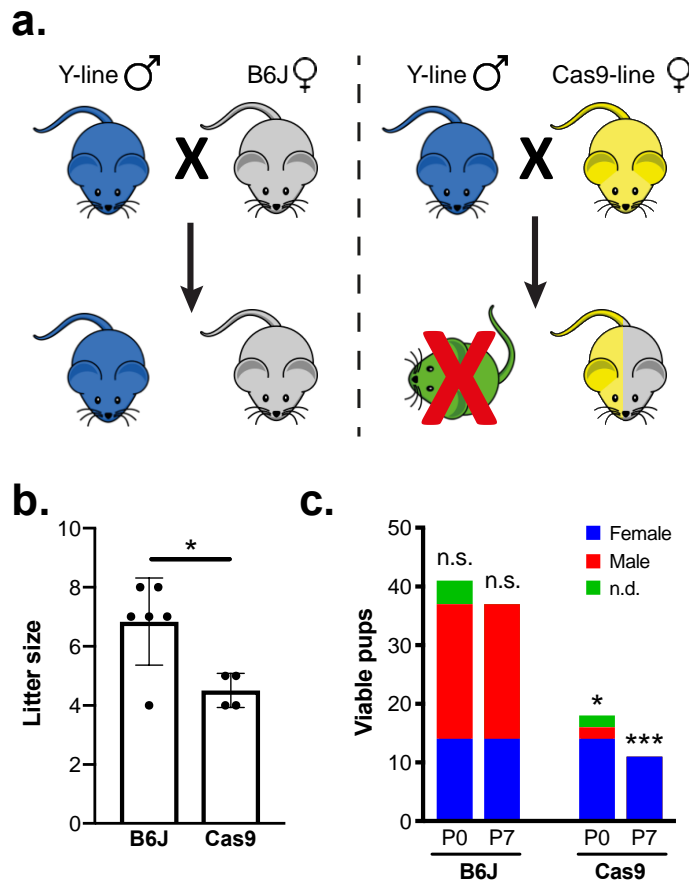

66 **Figure 1. Schematic illustration of the crosses and their outcome.** (a) The crosses between the  
67 Y-line males (blue) with C57BL/6J females (grey) are illustrated on the left, and those of the Y-  
68 line males with Cas9-line females (yellow) on the right. The green crossed mice are the males  
69 carrying both Cas9 and Y-encoded gRNAs, and are expected to be inviable. (b) Litter size of the  
70 crosses of the Y-line males with the indicated female line. Dots represent individual births and bars  
71 represent average  $\pm$  standard deviation. Significance was determined using a two-tailed unpaired  
72 parametric t-test. (c) Sex distribution of the total pups born from the crosses of the Y-line males  
73 with the indicated female line at day of birth (P0) and at 7 days post birth (P7). Significance was  
74 determined using a two-tailed binomial test, assuming normal 1:1 male:female ratio. n.d., not  
75 determined; n.s., not significant; \*,  $P < 0.05$ ; \*\*\*,  $P < 0.001$ .

76           The dead mice from the cross of the Y-line with the C57BL/6J females could not  
77 be analyzed as they were eaten by their mother. To determine the sex of 5 pups whose  
78 remains could be distinguished out of the 7 dead pups from the crosses between the Y-line  
79 males with the Cas9-line females, we carried out PCR amplifying the Y chromosome.  
80 These analyses revealed 2 males and 3 females among these pups. One of these males was  
81 deformed, lacking developed limbs, and was most likely born dead (Fig. S2a) suggesting  
82 that the genetic system eliminated this male. The other male appeared paler and smaller  
83 compared to its siblings (Fig. S2b) suggesting that its premature death is also due to the  
84 genetic system. Indeed, DNA sequencing of the three target genes demonstrated that three  
85 or two of these genes were disrupted in the cells of the first and second dead males,  
86 respectively (Fig. S3). These results indicate that all males were targeted, but also that the  
87 onset of lethality could be sporadically delayed probably due to differences in the type and  
88 extent of disruption of the target genes. These occurrences of late lethality could probably  
89 be eliminated by simultaneous targeting of more genes using gRNAs that target multiple  
90 chromosomal regions<sup>23</sup> or by addition of gRNAs targeting more genes/regions than the  
91 current system.

92           Based on similar principles, one can also establish lines producing only male  
93 progeny. For such an outcome, the paternal line should be engineered to encode the gRNAs  
94 on its X chromosome, and should be crossed with the maternal Cas9-line. Applying this  
95 system in animals in which the female is the heterogametic organism, such as chicken,  
96 where the female carries the Z and W sex chromosome, and the male carries two copies of  
97 the Z chromosome<sup>24</sup> can also be manipulated similarly. In these cases, for female-only  
98 progeny, the Z chromosome of the maternal line should encode the gRNAs, and the  
99 paternal line should encode Cas9. For male-only progeny, the maternal W chromosome  
100 should encode the gRNAs and paternal line should encode Cas9. Thus, this system can  
101 easily be manipulated to accommodate changing requirements in different organisms and  
102 for both genders.

103           The females obtained using this approach are genetically modified organisms  
104 (GMO) because they retain the Cas9 enzyme in their genome. In mice, these are normal-  
105 looking, fertile, and viable animals<sup>18</sup>. Nevertheless, from a regulatory point of view, a non-

106 enzymatic transgene, such as short gRNAs, may be considered more tolerable than the  
107 Cas9 nuclease is. Thus, the system can be modified to obtain females that instead encode  
108 the gRNAs in their genome, if in that case Cas9 is encoded on the paternal Y chromosome.  
109 In this respect, it is noteworthy that a GMO salmon, which grows faster than its parental  
110 non-GMO strain, owing to a transgene regulating a growth hormone, has been approved  
111 by the US Food and Drug Administration for the food industry<sup>25</sup>. Thus, GMOs may, in  
112 principle, be approved for food production.

113         Using the system shown here in the poultry industry has the potential for an annual  
114 saving of approximately seven billion newborn male chicks from cruel death by either  
115 suffocation or live-grinding<sup>1</sup>. This use will require minimal manual sexing, as male eggs  
116 will be significantly reduced or even eliminated with an optimized system, thus saving also  
117 costs and labor. Additionally, it may be used for producing a single-sex population of cattle,  
118 desired fish, crustaceans, as well as feminized seeds of certain crops such as *Cannabis*  
119 *sativa* and *Humulus lupulus*. Thus, apart from animal welfare and ethical considerations,  
120 the use of the system will unleash huge economic benefits and savings.

## 121 **Methods**

122 **Mice:** All mice were bred under specific pathogen-free conditions in the animal facility at  
123 Tel Aviv University. Experiments were performed according to the guidelines of the  
124 Institute's Animal Ethics Committee.

125 Mice of the Cas9-line were purchased from Jackson laboratories (Stock No: 026179;  
126 Rosa26-Cas9 knockin on C57BL/6J)<sup>18</sup>. These mice encode a cassette in the Rosa26 locus  
127 on chromosome 6 constitutively expressing the *SpCas9* endonuclease from a CAG  
128 promoter.

129 Mice of the Y-line were constructed by Cyagen Biosciences (California, USA). These  
130 C57BL/6N mice encode the following guide RNAs on their Y chromosome: 5'-  
131 CACTGCCACCGGGCGAATCG-3'; 5'-CAGACCTGAATCTTGTAGAT-3'; 5'-  
132 TGCAGAGATGAGCCTCAAAA-3' targeting the genes *Atp5b*, *Cdc20*, and *Casp8*,  
133 respectively. These guides were cloned into a vector targeting the reverse orientation of the  
134 2<sup>nd</sup> exon of the Y chromosome *Uty* gene, which is not part of the pseudoautosomal Y  
135 region. Figure S1 provides a schematic summary and Appendix 1 provides detailed  
136 description of the Y-line construction.

137 **Crosses and sex determination:** Males from the Y-line were crossed with females from  
138 the Cas9-line and with wild-type C57BL/6J females. Sex was determined by observing the  
139 genitals at day 7 or by PCR of the Y chromosome on DNA extracted from the animal's  
140 tissue. Sanger sequencing of the target regions was carried out following PCR  
141 amplification of these regions (see Tables S1+S2 for oligonucleotides and PCR set-ups).

142 **Statistics:** Data are presented as the mean  $\pm$  standard deviation. Comparisons were  
143 performed using two-tailed unpaired parametric t-test or two-tailed binomial test,  
144 assuming normal distribution or two-tailed t-test of the variance-covariance matrix of the  
145 standard errors.

## 146 **Data Availability Statement**

147 The data that support the findings of this study are available from the corresponding authors  
148 upon request.

## 149 **Acknowledgements**

150 The research was funded by the European Research Council StG program (grant 336079), the  
151 European Research Council PoC program (grant 811322), the Israel Science Foundation (grants  
152 268/14, 1416/15), the Israeli Ministry of Science (grant 3-14351), and individual research grant  
153 from the Varda and Boaz Dotan Research Center.

## 154 **Author Contributions**

155 Conceptualization, I.Y., U.Q.; Methodology, I.Y., I.S., R.G., L.E.B., M.G., and U.Q.;  
156 Investigation, I.Y., I.S., R.G., L.E.B., M.G., and U.Q.; Writing – Original Draft, U.Q.;  
157 Writing – Review & Editing, I.Y., M.G., A.M., and U.Q.; Funding Acquisition, M.G. and  
158 U.Q.; Supervision, M.G. and U.Q.

## 159 **Competing interests**

160 The authors declare no competing interests.



## References

- 1 Krautwald-Junghanns, M. E. *et al.* Current approaches to avoid the culling of day-old male chicks in the layer industry, with special reference to spectroscopic methods. *Poult Sci* **97**, 749-757 (2018).
- 2 Levy, T. *et al.* A Single Injection of Hypertrophied Androgenic Gland Cells Produces All-Female Aquaculture. *Mar Biotechnol (NY)* **18**, 554-563 (2016).
- 3 Liu, H. *et al.* Genetic manipulation of sex ratio for the large-scale breeding of YY super-male and XY all-male yellow catfish (*Pelteobagrus fulvidraco* (Richardson)). *Mar Biotechnol (NY)* **15**, 321-328 (2013).
- 4 Yamamoto, T. O. A YY male goldfish from mating estrone-induced XY female and normal male. *J Hered* **66**, 2-4 (1975).
- 5 Chevassus, B., Devaux, A., Chourrout, D. & Jalabert, B. Production of YY rainbow trout males by self-fertilization of induced hermaphrodites. *J Hered* **79**, 89-92 (1988).
- 6 Hickey, W. A. & Craig, G. B., Jr. Genetic distortion of sex ratio in a mosquito, *Aedes aegypti*. *Genetics* **53**, 1177-1196 (1966).
- 7 Novitski, E. & Hanks, G. D. Analysis of Irradiated *Drosophila* Populations for Meiotic Drive. *Nature* **190**, 989 (1961).
- 8 Hall, A. B. *et al.* SEX DETERMINATION. A male-determining factor in the mosquito *Aedes aegypti*. *Science* **348**, 1268-1270 (2015).
- 9 Galizi, R. *et al.* A CRISPR-Cas9 sex-ratio distortion system for genetic control. *Sci Rep* **6**, 31139 (2016).
- 10 Galizi, R. *et al.* A synthetic sex ratio distortion system for the control of the human malaria mosquito. *Nat Commun* **5**, 3977 (2014).
- 11 Kyrou, K. *et al.* A CRISPR-Cas9 gene drive targeting doublesex causes complete population suppression in caged *Anopheles gambiae* mosquitoes. *Nat Biotechnol* (2018).
- 12 Hammond, A. *et al.* A CRISPR-Cas9 gene drive system targeting female reproduction in the malaria mosquito vector *Anopheles gambiae*. *Nat Biotechnol* **34**, 78-83 (2016).
- 13 Koopman, P., Gubbay, J., Vivian, N., Goodfellow, P. & Lovell-Badge, R. Male development of chromosomally female mice transgenic for *Sry*. *Nature* **351**, 117-121 (1991).
- 14 Ge, C. *et al.* The histone demethylase KDM6B regulates temperature-dependent sex determination in a turtle species. *Science* **360**, 645-648 (2018).
- 15 Harris, A. *et al.* ZNRF3 functions in mammalian sex determination by inhibiting canonical WNT signaling. *Proc Natl Acad Sci U S A* **115**, 5474-5479 (2018).
- 16 Quinn, A. & Koopman, P. The molecular genetics of sex determination and sex reversal in mammals. *Semin Reprod Med* **30**, 351-363 (2012).
- 17 Wilhelm, D., Palmer, S. & Koopman, P. Sex determination and gonadal development in mammals. *Physiol Rev* **87**, 1-28 (2007).
- 18 Platt, R. J. *et al.* CRISPR-Cas9 knockin mice for genome editing and cancer modeling. *Cell* **159**, 440-455 (2014).
- 19 Dickinson, M. E. *et al.* High-throughput discovery of novel developmental phenotypes. *Nature* **537**, 508-514 (2016).

- 20 Varfolomeev, E. E. *et al.* Targeted disruption of the mouse Caspase 8 gene ablates cell death induction by the TNF receptors, Fas/Apo1, and DR3 and is lethal prenatally. *Immunity* **9**, 267-276 (1998).
- 21 Li, M., York, J. P. & Zhang, P. Loss of Cdc20 causes a securin-dependent metaphase arrest in two-cell mouse embryos. *Mol Cell Biol* **27**, 3481-3488 (2007).
- 22 Kaiser, W. J. *et al.* RIP3 mediates the embryonic lethality of caspase-8-deficient mice. *Nature* **471**, 368-372 (2011).
- 23 Zuo, E. *et al.* CRISPR/Cas9-mediated targeted chromosome elimination. *Genome Biol* **18**, 224 (2017).
- 24 Takagi, N. & Sasaki, M. A phylogenetic study of bird karyotypes. *Chromosoma* **46**, 91-120 (1974).
- 25 Waltz, E. First genetically engineered salmon sold in Canada. *Nature* **548**, 148 (2017).
- 26 Brinkman, E. K., Chen, T., Amendola, M. & van Steensel, B. Easy quantitative assessment of genome editing by sequence trace decomposition. *Nucleic Acids Res* **42**, e168 (2014).

## Supplementary Material

**a.**

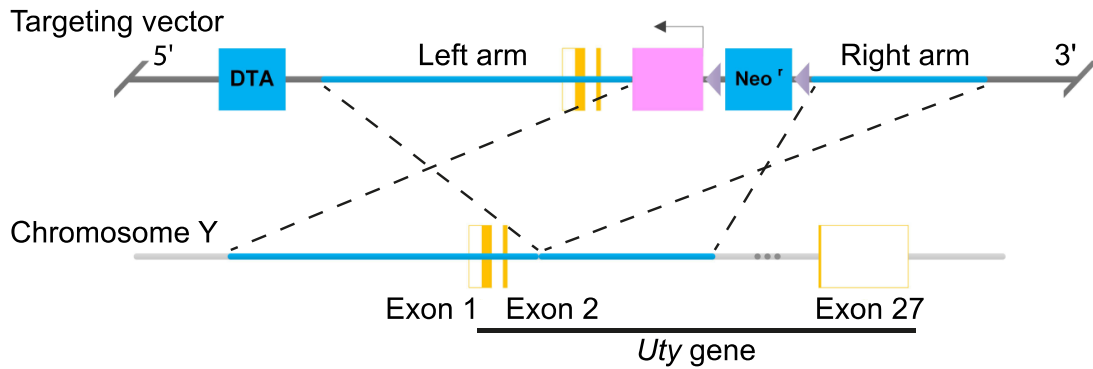

**b.**

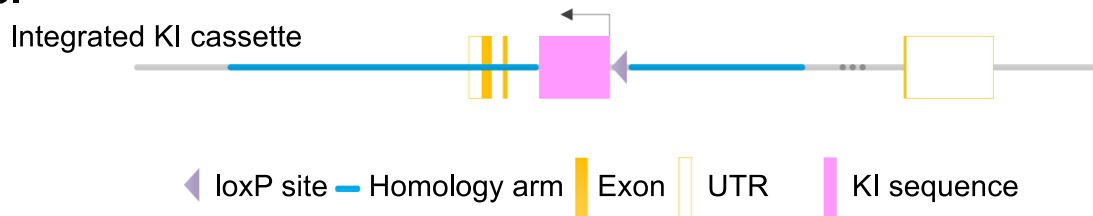

**Figure S1.** Schematic summary of Y-line generation. (a) Mouse genomic fragments containing homology arms to the *Uty* gene located on mouse chromosome Y were amplified from a BAC clone, and sequentially assembled into a targeting vector along with negative and positive selection markers (DTA and Neo, respectively). The KI cassette, encoding the gRNAs targeting genes *Atp5b*, *Cdc20*, and *Casp8* was inserted into the targeting vector, which was designed to integrate in reverse orientation of the 2<sup>nd</sup> exon of the *Uty* gene. (b) The KI cassette integrated into the *Uty* gene and the Neo cassette was self-deleted due to the loxP sites. Details on the linearization of the targeting vector, its transfection into C57BL/6N ES cells, as well as PCR and Southern blot analyses and ES implantation procedures are provided in Appendix 1.

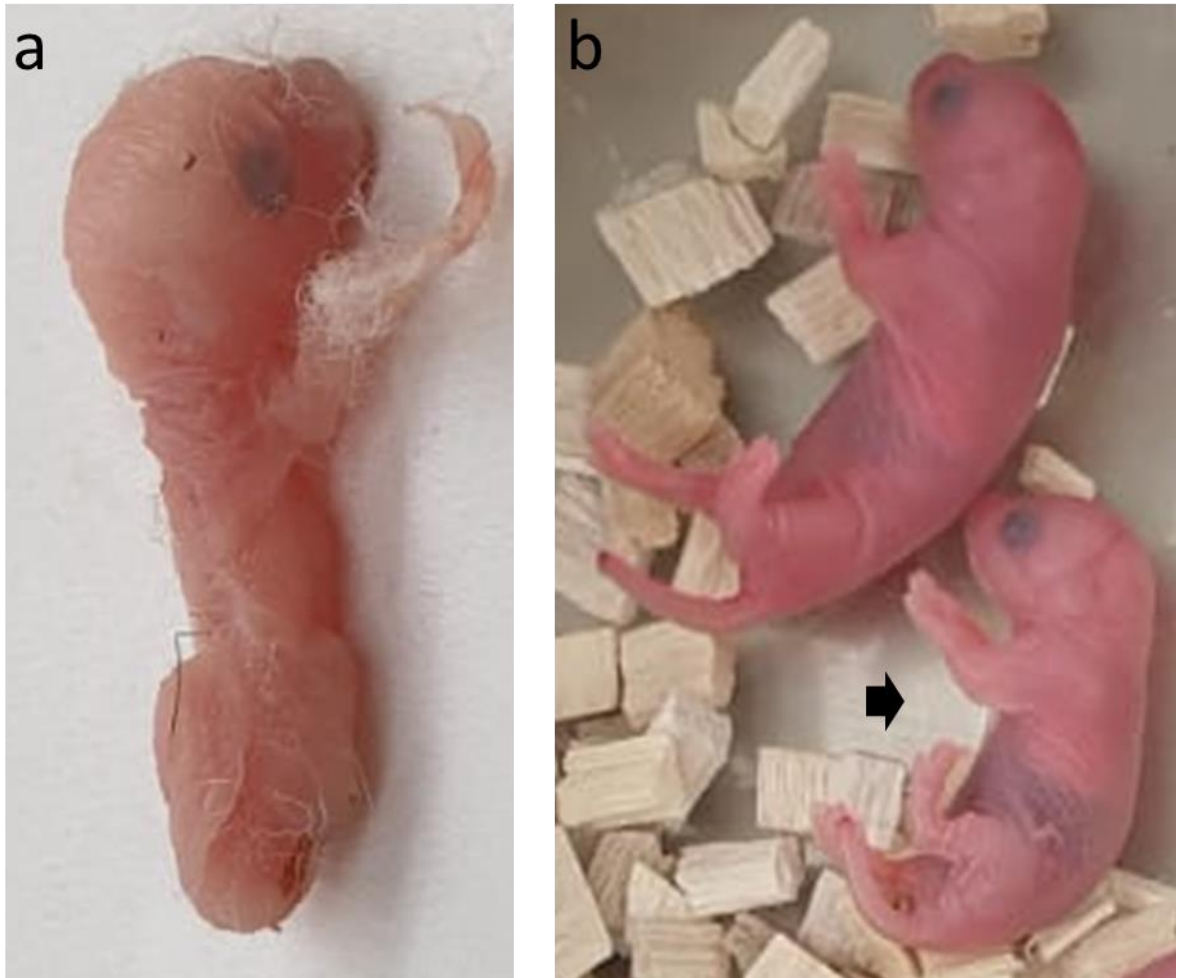

**Figure S2.** Pictures of the (a) deformed and of (b) smaller and paler (arrowed) males born from a cross between the Y-line males and the Cas9-line females.

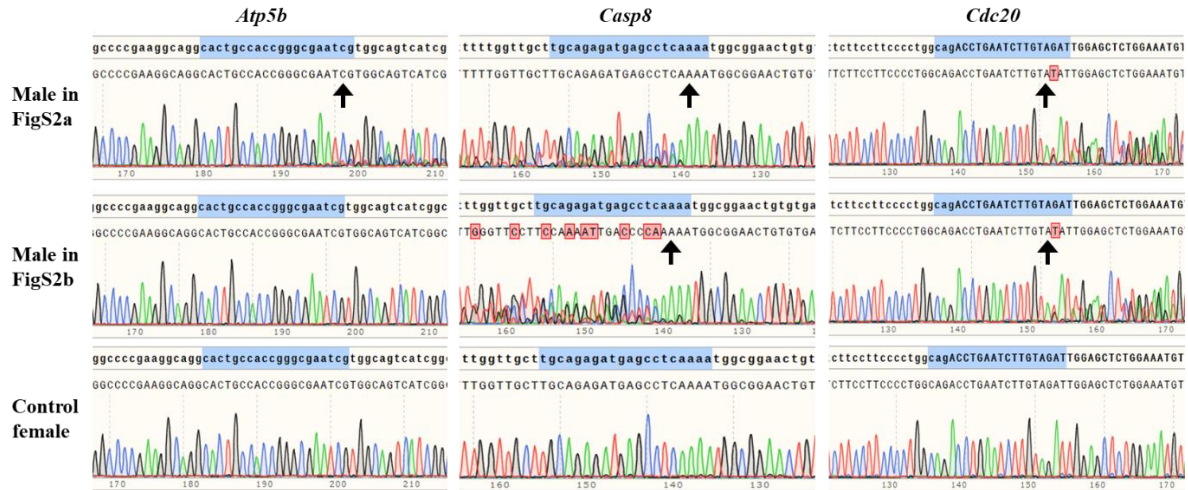

**Figure S3.** Chromatograms of Sanger DNA sequencing of the PCR amplified genes *Atp5b*, *Casp8*, and *Cdc20*, from samples of the indicated dead males and from a control normal dead female. Targeted regions homologous to the gRNAs are highlighted in blue. Arrows point to indel locations ( $P < 0.001$ , two-tailed  $t$ -test of the variance–covariance matrix of the standard errors), as determined by Tracking of Indels by Decomposition<sup>26</sup>.

**Table S1.** Oligonucleotides used in this study

| Oligonucleotides | 5'→3'                      |
|------------------|----------------------------|
| Y forward        | GGCAGTGGGTGTTTCGTCCCTT     |
| Y reverse        | AACTGTTTCATTTCCCCTCTCCTC   |
| Y-WT forward     | GGTAAGGAGATAAAGAGTTTCCGTAC |
| Cas9-M forward   | ACACCAGCACCAAAGAGGTG       |
| Cas9-M reverse   | GTAGGTCAGGGTGGTCACGA       |
| Cas9-WT forward  | AAGGGAGCTGCAGTGGAGTA       |
| Cas9-WT reverse  | CCGAAAATCTGTGGGAAGTC       |
| IY573F           | GTCCCCGATTGCAGCGTGCC       |
| IY573R           | CATCACAGAATGGAGATGGC       |
| IY574F           | GGCTACCAGAACAGACTGAA       |
| IY574R           | ATACAGGCAACCAGGCTCAC       |
| IY575F           | CCACACACACATGCCATAGC       |
| IY575R           | CTGGAGAGGCTATCTTAACTGG     |
| RG287F           | GACTTGCAGATACATCCCTTC      |
| RG285R           | CCAGAGTTTCCAAAAGGCTC       |

**Table S2.** PCR set-ups

| Reaction                      | Oligonucleotides used                              |
|-------------------------------|----------------------------------------------------|
| Y-locus genotyping            | Y forward + Y reverse                              |
| Sex determination             | Y-WT forward + Y reverse                           |
| <i>Cas9</i> -locus genotyping | Cas9-M forward + Cas9-WT forward + Cas9-WT reverse |
| <i>Atp5b</i> amplification    | IY573F + IY573R                                    |
| <i>Casp8</i> amplification    | IY575F + IY575R                                    |
| <i>Cdc20</i> amplification    | IY574F + IY574R                                    |
| <i>Atp5b</i> sequencing       | IY573F                                             |
| <i>Casp8</i> sequencing       | RG285R                                             |
| <i>Cdc20</i> sequencing       | RG287F                                             |
